# Supplementary material for: Potentiating Biosynthesis of Alkaloids and Polyphenolic Substances in Catharanthus roseus Plant Using ĸ-Carrageenan
Source: MDPI journal article supplement (doi:10.3390/molecules28083642), 2023-04-21
Supplement: s1 [file s1]

# Short Report (ESTD)

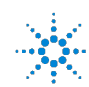

Agilent Technologies

**Data file:** D:\CHEM32\1\DATA\ALKALOIDS\FSQC0147-2023 1405 2023-04-11 10-52-29.D  
**Sample name:** FSQC0147-2023  
**Description:**  
**Instrument:** FSQC-HPLC1260  
**Injection date:** 4/11/2023 10:52:29 AM  
**Acq. method:** VINBLASTINE\_LC.M  
**Analysis method:** VINBLASTINECAL **Last changed:** 4/11/2023 1:17:10 PM  
**Sample type:** Sample **ID:**  
**Injection volume:** No injector **Sample amount:** 10.000 **Dilution:** 2  
**Multiplier:** 1

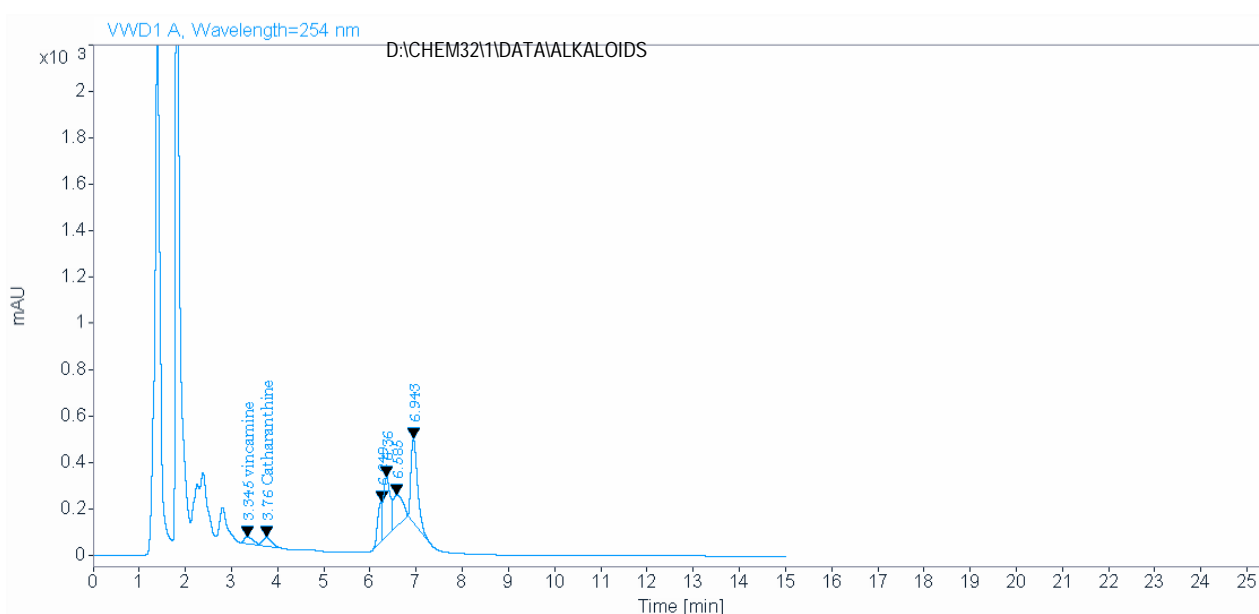

**Signal:** VWD1 A, Wavelength=254 nm

| Name          | Compound_ExpectedRetTime | RT [min]  | Area     | Amount [ug/g] |
|---------------|--------------------------|-----------|----------|---------------|
| vincamine     | 3.280                    | 3.35      | 425.6965 | 24.911        |
| Catharanthine | 3.900                    | 3.76      | 557.7837 | 9.878         |
|               |                          | Number of |          | 2.0           |
|               |                          | Max       |          | 24.91         |
|               |                          | Min       |          | 9.88          |

| Compound Name | Expected RT |
|---------------|-------------|
| Vinblastin    | 13.99       |
| Vinracine     | 5.89        |

## Short Report (ESTD)

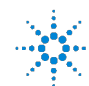

Agilent Technologies

Data file: D:\CHEM32\1\DATA\ALKALOIDS\FSQC0148-2023 1402 2023-04-1013-03-07.D  
Sample name: FSQC0148-2023  
Description:  
Instrument: FSQC-HPLC1260  
Injection date: 4/10/2023 1:03:07 PM  
Acq. method: VINBLASTINE\_LC.M  
Analysis method: VINBLASTINECAL Last changed: 4/11/2023 1:15:36 PM  
Sample type: Sample ID:  
Injection volume: No injector Sample amount: 10.000 Dilution: 2  
Multiplier: 1

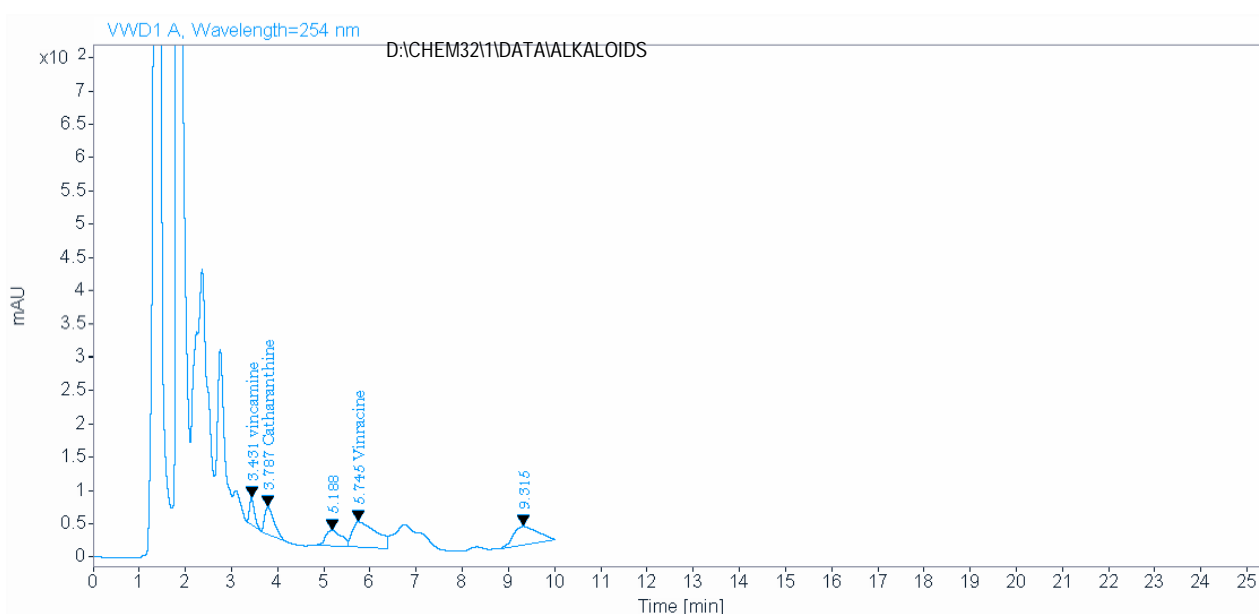

Signal: VWD1 A, Wavelength=254 nm

| Name          | Compound_ExpectedRetTime | RT [min]  | Area      | Amount [ug/g] |
|---------------|--------------------------|-----------|-----------|---------------|
| vincamine     | 3.280                    | 3.43      | 310.4533  | 18.167        |
| Catharanthine | 3.900                    | 3.79      | 575.6954  | 10.157        |
| Vinracine     | 5.890                    | 5.75      | 1373.0406 | 13.522        |
|               |                          | Number of |           | 3.0           |
|               |                          | Max       |           | 18.17         |
|               |                          | Min       |           | 10.16         |

| Compound Name | Expected RT |
|---------------|-------------|
| Vinblastin    | 13.99       |

## Short Report (ESTD)



Agilent Technologies

Data file: D:\CHEM32\1\DATA\ALKALOIDS\FSQC0149-2023 1407 2023-04-11 11-28-28.D  
Sample name: FSQC0149-2023  
Description:  
Instrument: FSQC-HPLC1260  
Injection date: 4/11/2023 11:28:28 AM  
Acq. method: VINBLASTINE\_LC.M  
Analysis method: VINBLASTINECAL Last changed: 4/11/2023 1:07:04 PM  
Sample type: Sample ID:  
Injection volume: No injector Sample amount: 10.000 Dilution: 2  
Multiplier: 1

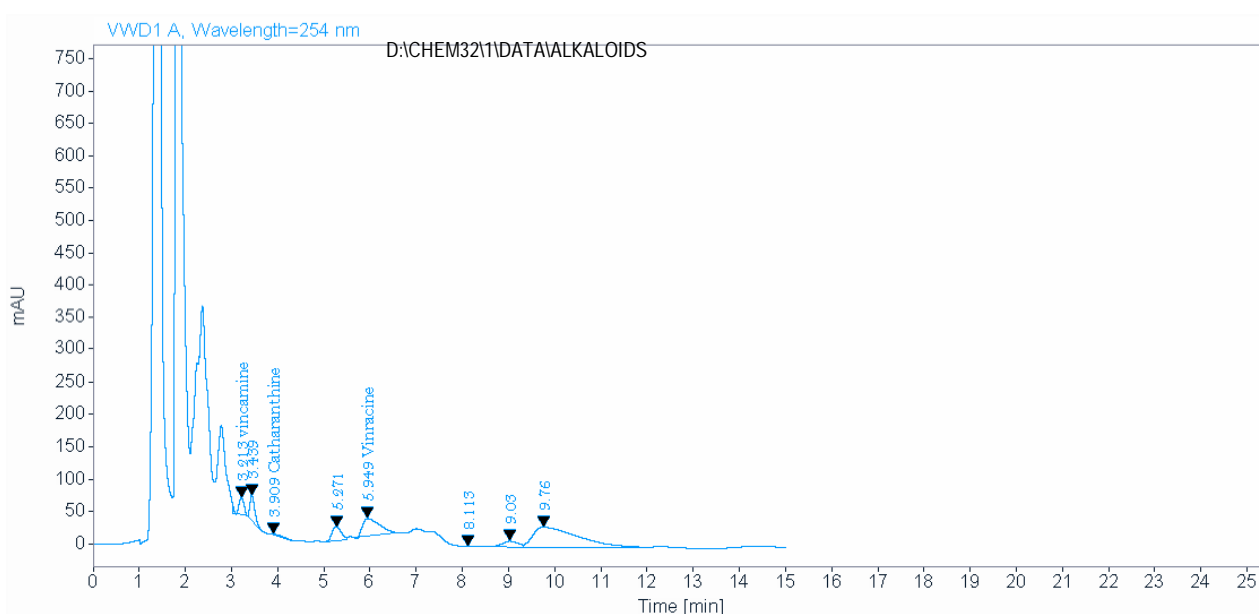

Signal: VWD1 A, Wavelength=254 nm

| Name          | Compound_ExpectedRetTime | RT [min]  | Area     | Amount [ug/g] |
|---------------|--------------------------|-----------|----------|---------------|
| vincamine     | 3.280                    | 3.21      | 205.7971 | 12.043        |
| Catharanthine | 3.900                    | 3.91      | 25.4016  | 1.559         |
| Vinracine     | 5.890                    | 5.95      | 659.5424 | 6.574         |
|               |                          | Number of |          | 3.0           |
|               |                          | Max       |          | 12.04         |
|               |                          | Min       |          | 1.56          |

| Compound Name | Expected RT |
|---------------|-------------|
| Vinblastin    | 13.99       |

## Short Report (ESTD)



Agilent Technologies

Data file: D:\CHEM32\1\DATA\ALKALOIDS\FSQC0150-2023 1406 2023-04-11 11-10-46.D  
Sample name: FSQC0150-2023  
Description:  
Instrument: FSQC-HPLC1260  
Injection date: 4/11/2023 11:10:46 AM  
Acq. method: VINBLASTINE\_LC.M  
Analysis method: VINBLASTINECAL Last changed: 4/11/2023 1:21:55 PM  
Sample type: Sample ID:  
Injection volume: No injector Sample amount: 10.000 Dilution: 2  
Multiplier: 1

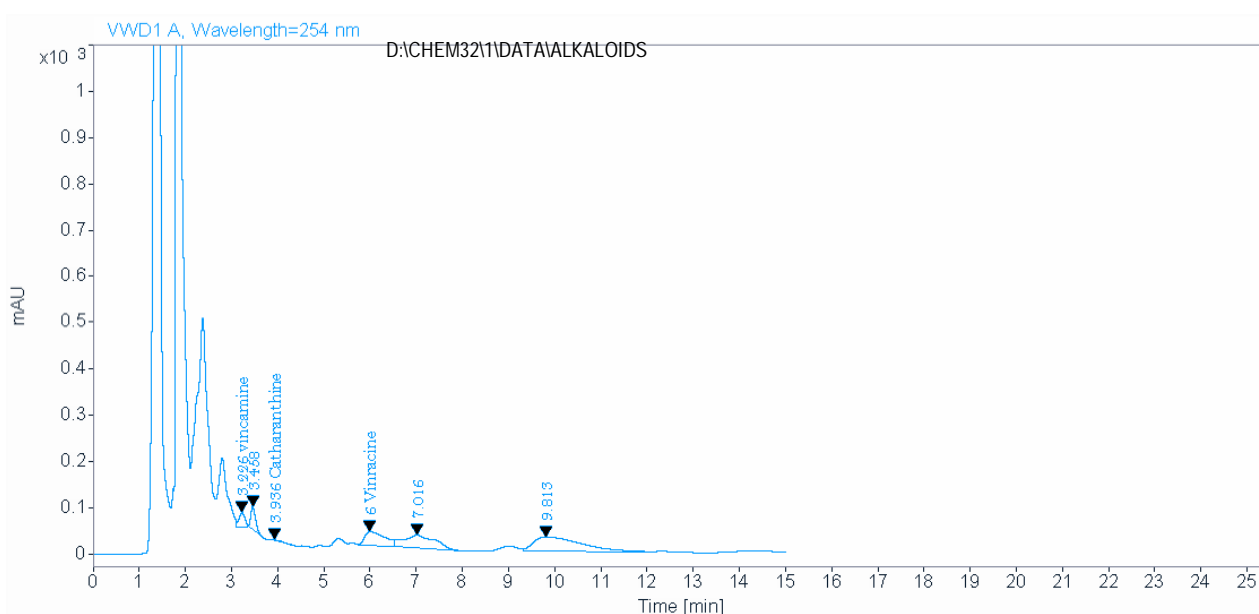

Signal: VWD1 A, Wavelength=254 nm

| Name          | Compound_ExpectedRetTime | RT [min]  | Area     | Amount [ug/g] |
|---------------|--------------------------|-----------|----------|---------------|
| vincamine     | 3.280                    | 3.23      | 277.2920 | 16.227        |
| Catharanthine | 3.900                    | 3.94      | 32.0091  | 1.662         |
| Vinracine     | 5.890                    | 6.00      | 921.9019 | 9.129         |
|               |                          | Number of |          | 3.0           |
|               |                          | Max       |          | 16.23         |
|               |                          | Min       |          | 1.66          |

| Compound Name | Expected RT |
|---------------|-------------|
| Vinblastin    | 13.99       |
